# Supplementary material for: Anti-Inflammatory Effects of Mitrephora sirikitiae Leaf Extract and Isolated Lignans in RAW 264.7 Cells
Source: MDPI journal article supplement (doi:10.3390/molecules27103313), 2022-05-21
Supplement: s1 [file s1]

# Anti-inflammatory effects of *Mitrephora sirikitiae* leaf extract and isolated lignans in RAW 264.7 cells

Supachoke Mangmool <sup>1</sup>, Chayaporn Limpichai <sup>2</sup>, Khine Kyi Han <sup>3</sup>, Vichai Reutrakul <sup>4,5</sup> and

Natthinee Anantachoke <sup>2,5,\*</sup>

<sup>1</sup> Department of Pharmacology, Faculty of Science, Mahidol University, Bangkok 10400, Thailand; supachoke.man@mahidol.ac.th (S.M.)

<sup>2</sup> Department of Pharmacognosy, Faculty of Pharmacy, Mahidol University, Bangkok 10400, Thailand; chayapornlim@gmail.com (C.L.)

<sup>3</sup> Department of Pharmacology, University of Pharmacy, Yangon, 11031, Myanmar; khinekyihanuop@gmail.com (K.K.H.)

<sup>4</sup> Department of Chemistry, Faculty of Science, Mahidol University, Bangkok 10400, Thailand; vichai.reu@mahidol.ac.th (V.R.)

<sup>5</sup> Center of Excellence for Innovation in Chemistry, Faculty of Science, Mahidol University, Bangkok 10400, Thailand; natthinee.ana@mahidol.ac.th (N.A.)

\* Correspondence: natthinee.ana@mahidol.ac.th

## Spectroscopic and physical data of isolated lignans 1-6 from *Mitrephora sirikitiae* Leaf extract.

### 1. (-)-Epieudesmin (1)

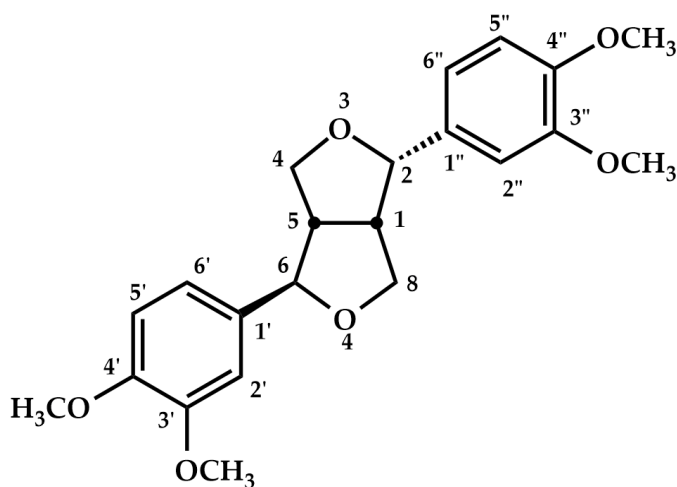

**Physical characteristics:** Colorless crystals from CH<sub>2</sub>Cl<sub>2</sub>/MeOH; m.p. 128-130 °C

$[\alpha]_D^{25}$ : -123.66 (*c* 1.0, CHCl<sub>3</sub>)

UV  $\lambda_{\max}^{\text{MeOH}}$  nm (log  $\epsilon$ ): 231 (3.91), 279 (4.38)

FTIR (neat)  $\nu_{\max}$ : 2918, 2915, 1607, 1590, 1463, 1265, 1160, 1142 cm<sup>-1</sup>

HR-ESI-MS *m/z*: 409.1621 [M+Na]<sup>+</sup>

EI-MS *m/z* (% relative intensity): 386 [M]<sup>+</sup> (68), 355 [M-OCH<sub>3</sub>]<sup>+</sup> (6), 340 [M-OCH<sub>3</sub>-CH<sub>3</sub>]<sup>+</sup> (9), 309 [M-2OCH<sub>3</sub>-CH<sub>3</sub>]<sup>+</sup> (7), 220 (10), 205 (13), 194 (14), 189 (15), 177 (36), 165 (100), 151 (26)

**<sup>1</sup>H-NMR (500 MHz, CDCl<sub>3</sub>)  $\delta$  ppm (mult., J (Hz)):** 6.97 (1H, *d*, 1.1 Hz, H-2''), 6.95 (1H, *d*, 1.9 Hz, H-2'), 6.93 (1H, *dd*, 8.2, 1.9 Hz, H-6'), 6.90 (1H, *d*, 8.4 Hz, H-6''), 6.88 (1H, *d*, 8.4 Hz, H-5''), 6.87 (1H, *d*, 8.2 Hz, H-5'), 4.91 (1H, *d*, 5.7 Hz, H-2), 4.48 (1H, *d*, 7.2 Hz, H-6), 4.16 (1H, *dd*, 9.4, 0.8 Hz, H-4), 3.94 (3H, *s*, OMe-3''), 3.93 (3H, *s*, OMe-3'), 3.92 (3H, *s*, OMe-4''), 3.91 (3H, *s*, OMe-4'), 3.88 (1H, *m*, H-8), 3.88 (1H, *m*, H-4), 3.39 (1H, *m*, H-1), 3.34 (1H, *t*, 8.4 Hz, H-8), 2.95 (1H, *m*, H-5)

**<sup>13</sup>C-NMR (125 MHz, CDCl<sub>3</sub>)  $\delta$  ppm:** 149.28 (C-3'), 148.90 (C-3''), 148.77 (C-4'), 148.07 (C-4''), 133.72 (C-1'), 131.00 (C-1''), 118.47 (C-6'), 117.75 (C-6''), 111.10 (C-5', C-5''), 109.23 (C-2'), 109.01 (C-2''), 87.64 (C-6), 82.07 (C-2), 71.04 (C-4), 69.74 (C-8), 55.97 (OMe-4'), 55.95 (OMe-4''), 55.93 (OMe-3', OMe-3''), 54.50 (C-5), 50.18 (C-1)

## 2. (-)-Phylligenin (2)

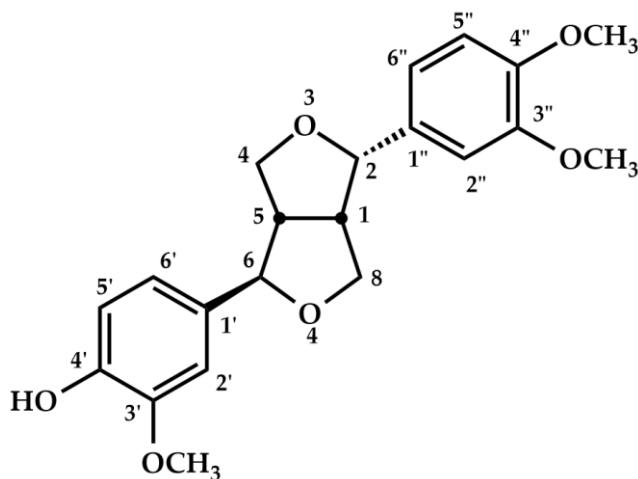

**Physical characteristics:** Colorless crystals from CH<sub>2</sub>Cl<sub>2</sub>/MeOH; m.p. 135-136 °C;

$[\alpha]_D^{24}$ : -128.53 (*c* 1.0, CHCl<sub>3</sub>)

**UV  $\lambda_{max}^{MeOH}$  nm (log  $\epsilon$ ):** 231 (3.95), 280 (4.38)

**FTIR (neat)  $\nu_{max}$ :** 3430, 2961, 2939, 2844, 1607, 1589, 1515, 1469, 1460, 1447, 1460, 1417, 1382, 1347, 1278, 1264, 1256, 1236, 1193, 1157, 1143, 1127, 1076, 1023 cm<sup>-1</sup>

**HR-ESI-MS  $m/z$ :** 395.1471 [M+Na]<sup>+</sup>

**EI-MS  $m/z$  (% relative intensity):** 372 [M]<sup>+</sup> (68), 341 [M-OCH<sub>3</sub>]<sup>+</sup> (6), 326 [M-OCH<sub>3</sub>-CH<sub>3</sub>]<sup>+</sup> (9), 273 (8), 205 (21), 194 (13), 189 (19), 177 (27), 165 (42), 151 (100)

**<sup>1</sup>H-NMR (500 MHz, CDCl<sub>3</sub>)  $\delta$  ppm (mult., J (Hz)):** 6.99 (1H, *br s*, H-2'),  $\delta$  6.96 (1H, *d*, 1.7 Hz, H-2''), 6.91 (2H, *m*, H-6', H-6''), 6.93 (2H, *d*, 8.1 Hz, H-5', H-5''), 5.74 (1H, *s*, OH-4'), 4.92 (1H, *d*, 5.5 Hz, H-6), 4.48 (1H, *d*, 7.1 Hz, H-2), 4.18 (1H, *d*, 9.7 Hz, H-8), 3.99 (3H, *s*, OMe-3''), 3.93 (3H, *s*, OMe-3'), 3.92 (3H, *s*, OMe-4''), 3.89 (2H, *m*, H-4, H-8), 3.39 (2H, *m*, H-4, H-5), 2.95 (1H, *br dd*, 14.4, 7.2 Hz, H-1)

**<sup>13</sup>C-NMR (125 MHz, CDCl<sub>3</sub>)  $\delta$  ppm:** 148.82 (C-3'), 146.77 (C-3''), 147.98 (C-4'), 145.36 (C-4''), 133.00 (C-1'), 130.95 (C-1''), 119.22 (C-6''), 117.72 (C-6'), 114.28 (C-5''), 111.00 (C-5'), 108.91 (C-2'), 108.56 (C-2''),

87.77 (C-2), 82.66 (C-6), 71.02 (C-8), 69.73 (C-4), 55.95 (OMe-4''), 55.93 (OMe-3', OMe-3''), 54.52 (C-1), 50.16 (C-6)

### 3. 2-(3,4-Dimethoxyphenyl)-6-(3,5-dimethoxyphenyl)-3,7-dioxabicyclo[3.3.0]octane (3)

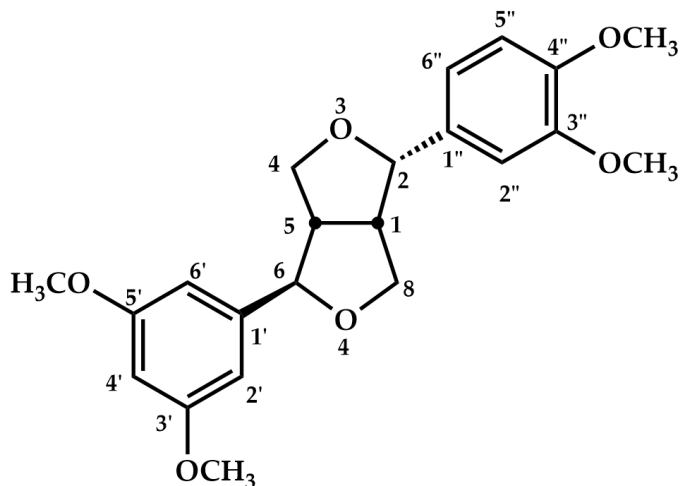

**Physical characteristics:** A pale yellow semisolid

$[\alpha]_D^{28.7}$ : -17.68 (*c* 1.0, MeOH)

**UV  $\lambda_{\max}^{\text{MeOH}}$  nm (log  $\epsilon$ ):** 230 (4.30), 280 (3.91)

**FTIR (neat)  $\nu_{\max}$ :** 2930, 2850, 1593, 1512, 1461, 1419, 1258, 1232, 1156, 1136, 1061, 1021  $\text{cm}^{-1}$

**HR-ESI-MS  $m/z$ :** 409.1621  $[\text{M}+\text{Na}]^+$

**EI-MS  $m/z$  (% relative intensity):** 386  $[\text{M}]^+$  (5), 384  $[\text{M}-2\text{H}]^+$  (34), 367 (14), 337 (41), 325 (82), 292 (32), 275 (20), 263 (27), 220 (32), 202 (41), 189 (100), 165 (85).

**$^1\text{H-NMR}$  (400 MHz,  $\text{CD}_3\text{OD}$ )  $\delta_{\text{H}}$  ppm (mult., *J* (Hz)):**  $\delta$  6.96 (1H, *s*, H-2'), 6.91 (3H, *br s*, H-4', H-6', H-2''), 6.88 (1H, *d*, 8.2 Hz, H-5''), 6.82 (1H, *dd*, 8.2, 1.7 Hz, H-6''), 4.64 (1H, *d*, 7.4 Hz, H-6), 4.50 (1H, *d*, 8.4 Hz, H-2), 4.25 (1H, *dd*, 8.8, 4.4 Hz, H-4), 3.95 (1H, *dd*, 8.8, 7.6 Hz, H-4), 3.82 (3H, *s*, 5'-OMe), 3.81 (3H, *s*, 3'-OMe), 3.79 (6H, *s*, 3''-OMe, 4''-OMe), 3.30 (1H, *m*, H-8), 3.23 (1H, *dd*, 16.5, 5.9 Hz, H-8), 2.54 (1H, *m*, H-5), 1.88 (1H, *m*, H-1)

**$^{13}\text{C-NMR}$  (100 MHz,  $\text{CD}_3\text{OD}$ )  $\delta_{\text{C}}$  ppm:** 150.51 (C-5'), 150.46 (C-3''), 149.98 (C-3', C-4''), 137.49 (C-1''), 136.25 (C-1'), 120.61 (C-6''), 120.02 (C-6'), 112.85 (C-4'), 112.71 (C-5''), 111.73 (C-2''), 111.32 (C-2'), 84.83 (C-6), 73.36 (C-2), 71.43 (C-4), 62.69 (C-8), 56.57 (3''-OMe), 56.50 (3'-OMe, 5'-OMe), 56.44 (4''-OMe), 53.57 (C-1), 50.77 (C-5)

#### 4. Magnone A (4)

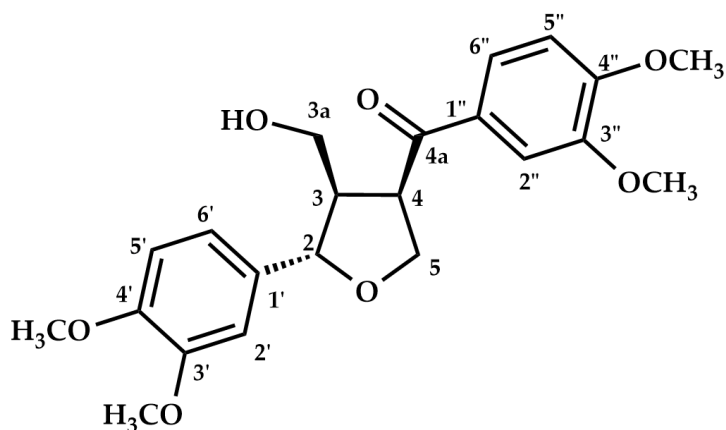

**Physical characteristics:** Colorless crystals from CH<sub>2</sub>Cl<sub>2</sub>/MeOH; m.p. 139-140 °C

$[\alpha]_D^{25}$ : 18.54 (*c* 1.0, MeOH)

UV  $\lambda_{\text{max}}^{\text{MeOH}}$  nm (log  $\epsilon$ ): 230 (4.37), 276 (4.13), 305 (3.93)

FTIR (neat)  $\nu_{\text{max}}$ : 3461, 2912, 2839, 1651, 1592, 1583, 1517, 1467, 1441, 1420, 1334, 1288, 1237, 1203, 1192, 1154, 1104, 1080, 1020 cm<sup>-1</sup>

HR-ESI-MS *m/z*: 425.1584 [M+Na]<sup>+</sup>

EI-MS *m/z* (% relative intensity): 368 (68), 355 (6), 340 (9), 309 (7), 220 (10), 205 (13), 194 (14), 189 (15), 177 (36), 165 (100), 151 (26).

<sup>1</sup>H-NMR (400 MHz, CDCl<sub>3</sub>)  $\delta$  ppm (mult., *J* (Hz)): 7.66 (1H, *dd*, 8.2, 2.0 Hz, H-6''),  $\delta$  7.63 (1H, *d*, 2.0 Hz, H-2''), 7.09 (1H, *d*, 1.9 Hz, H-2'), 6.99 (1H, *dd*, 8.2, 1.9 Hz, H-6'), 6.98 (1H, *d*, 8.3 Hz, H-5''), 6.89 (1H, *d*, 8.2 Hz, H-5'), 4.75 (1H, *d*, 9.0 Hz, H-2), 4.37 (1H, *dd*, 11.2, 10.9 Hz, H-5), 4.24 (2H, *m*, H-4, H-5), 4.01 (3H, *s*, OMe-4''), 4.00 (3H, *s*, OMe-4'), 3.97 (3H, *s*, OMe-3'), 3.93 (3H, *s*, OMe-3''), 3.84 (2H, *dd*, 10.9, 4.5 Hz, H-3a), 2.77 (1H, *m*, H-3)

<sup>13</sup>C-NMR (100 MHz, CDCl<sub>3</sub>)  $\delta$  ppm: 197.97 (C-4a), 153.70 (C-4''), 149.27 (C-4', C-3''), 148.95 (C-3'), 132.94 (C-1'), 129.75 (C-1''), 123.23 (C-6''), 119.36 (C-6', C-2''), 110.82 (C-5'), 110.72 (C-5''), 109.56 (C-2'), 83.82 (C-2), 70.90 (C-5), 61.51 (C-3a), 56.81 (OMe-4''), 56.06 (OMe-4'), 55.95 (OMe-3', OMe-3''), 52.14 (C-3), 49.72 (C-4)

## 5. Mitrephoran (5)

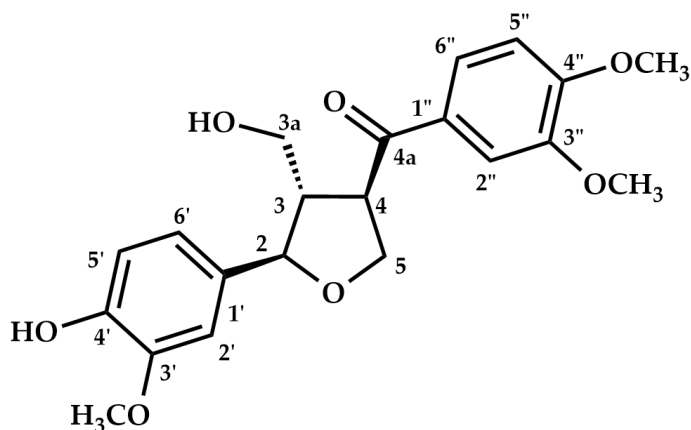

**Physical characteristics:** Colorless crystals were obtained from  $\text{CH}_2\text{Cl}_2/\text{MeOH}$ ; m.p. 146-148 °C

$[\alpha]_{\text{D}}^{25}$ : 14.00 ( $c$  0.45,  $\text{CHCl}_3$ )

UV  $\lambda_{\text{max}}^{\text{MeOH}}$  nm (log  $\epsilon$ ): 230 (4.37), 276 (4.13), 305 (3.93)

FTIR (neat)  $\nu_{\text{max}}$ : 3396, 3259, 2954, 2872, 2841, 1672, 1597, 1587, 1515, 1463, 1439, 1418, 1357, 1347, 1287, 1259, 1158, 1122, 1088, 1060, 1033, 1020, 1005, and 968  $\text{cm}^{-1}$

HR-ESI-MS  $m/z$ : 411.1420  $[\text{M}+\text{Na}]^+$

EI-MS  $m/z$  (% relative intensity): 388  $[\text{M}]^+$  (8), 218 (14), 196 (38), 180 (93), 165 (100), and 151 (60)

$^1\text{H-NMR}$  (400 MHz,  $\text{CDCl}_3$ )  $\delta$  ppm (mult.,  $J$  (Hz)): 7.67 (1H, dd, 8.4, 2.0 Hz, H-6''), 7.63 (1H, d, 2.0 Hz, H-2''), 7.08 (1H, br s, H-2'), 6.98 (1H, d, 8.4 Hz, H-5''), 6.94 (1H, m, H-6')\*, 6.93 (1H, m, H-5')\*, 4.73 (1H, d, 9.1 Hz, H-2), 4.37 (1H, m, H-5), 4.24 (2H, m, H-4, H-5), 4.02 (3H, s, 4''-OMe), 4.01 (3H, s, 3''-OMe), 3.99 (3H, s, 3'-OMe), 3.83 (1H, dd, 10.9, 4.4 Hz, H-3a), 3.73 (1H, dd, 10.9, 5.6 Hz, H-3a), 2.96 (1H, m, H-3)

\* H-5' and H-6' were observed as broad singlets because of the virtual coupling effects.

$^{13}\text{C-NMR}$  (100 MHz,  $\text{CDCl}_3$ )  $\delta$  ppm: 198.04 (C-4a), 153.70 (C-4''), 149.26 (C-3''), 146.88 (C-3'), 145.63 (C-4'), 132.31 (C-1'), 129.77 (C-1''), 123.23 (C-6''), 120.17 (C-6'), 114.04 (C-5''), 110.57 (C-2''), 110.12 (C-5'), 108.92 (C-2'), 83.91 (C-2), 70.85 (C-5), 61.44 (C-3a), 56.18 (4''-OMe), 56.06 (3''-OMe), 56.02 (3'-OMe), 52.21 (C-3), 49.67 (C-4)

## 6. 3',4'-O-Dimethylcedrusin (6)

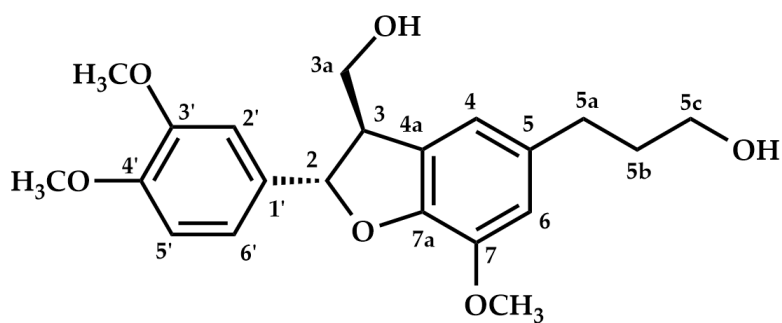

**Physical characteristics:** A pale yellow semisolid;  $[\alpha]_D^{28.7}$  -8.52 (c 0.1, CHCl<sub>3</sub>)

**UV  $\lambda_{\max}^{\text{MeOH}}$  nm (log  $\epsilon$ ):** 231 (4.19), 281 (3.73)

**FTIR (neat)  $\nu_{\max}$ :** 3375, 2934, 1604, 1515, 1497, 1451, 1422, 1323, 1259, 1235, 1210, 1137, 1021 cm<sup>-1</sup>

**HR-ESI-MS  $m/z$ :** 397.1624 [M+Na]<sup>+</sup>

**EI-MS  $m/z$  (% relative intensity):** 374 [M]<sup>+</sup> (4), 356 [M-H<sub>2</sub>O]<sup>+</sup> (83), 341 [M-CH<sub>3</sub>-H<sub>2</sub>O]<sup>+</sup> (100), 325 [M-OCH<sub>3</sub>-H<sub>2</sub>O]<sup>+</sup> (39), 309 (15).

**<sup>1</sup>H-NMR (400 MHz, CD<sub>3</sub>OD)  $\delta$  ppm (mult., J (Hz)):** 6.91 (1H, *br s*, H-2'), 6.88 (1H, *d*, 8.2, H-5'), 6.82 (1H, *dd*, 8.2, 1.7, H-6'), 6.72 (1H, *s*, H-6), 6.71 (1H, *s*, H-4), 5.52 (1H, *d*, 6.1 Hz, H-2), 3.84 (3H, *s*, 7-OMe), 3.81 (1H, *dd*, 11.0, 5.8 Hz, Hb-3a), 3.79 (3H, *s*, 4'-OMe), 3.77 (3H, *s*, 3'-OMe), 3.74 (1H, *dd*, 11.0, 7.3 Hz, Ha-3a), 3.56 (2H, *t*, 6.5 Hz, H-5c), 3.45 (1H, *m*, H-3), 2.61 (2H, *t*, 7.7 Hz, H-5a), 1.80 (2H, *tt*, 7.7, 6.5 Hz, H-5b)

**<sup>13</sup>C-NMR (100 MHz, CD<sub>3</sub>OD)  $\delta$  ppm:** 150.56 (C-3'), 150.25 (C-4'), 147.50 (C-7a), 145.22 (C-7), 136.99 (C-5), 136.19 (C-1'), 129.73 (C-4a), 119.43 (C-6'), 117.92 (C-4), 114.11 (C-6), 112.87 (C-5'), 110.70 (C-2'), 88.70 (C-2), 65.02 (C-3a), 62.23 (C-5c), 56.74 (7-OMe), 56.49 (4'-OMe), 56.42 (3'-OMe), 55.50 (C-3), 35.80 (C-5b), 32.89 (C-5a)
